# Supplementary material for: Gated spin manipulation in a bipolar Rashba semiconductor: a Janus TeSSe monolayer
Source: Royal Society of Chemistry journal article supplement (doi:10.1039/d4cp02910k), 2024-01-01
Supplement: d4cp02910k1.pdf [file d4cp02910k1.pdf]

## Gated Spin Manipulation in Bipolar Rashba semiconductor: Janus TeSse monolayer

Shao-Bo Chen<sup>a,\*</sup>, Wan-Jun Yan<sup>a</sup>, Ang Yee Sin<sup>b,\*</sup>

<sup>a</sup> College of Electronic and Information Engineering, Anshun University, Anshun  
561000, Peoples Republic of China;

<sup>b</sup> Science, Mathematics and Technology (SMT), Singapore University of Technology  
and Design (SUTD), 8 Somapah Road, Singapore 487372, Singapore

\* Corresponding author: shaobo.chen@yeah.net; yeessin\_ang@sutd.edu.sg

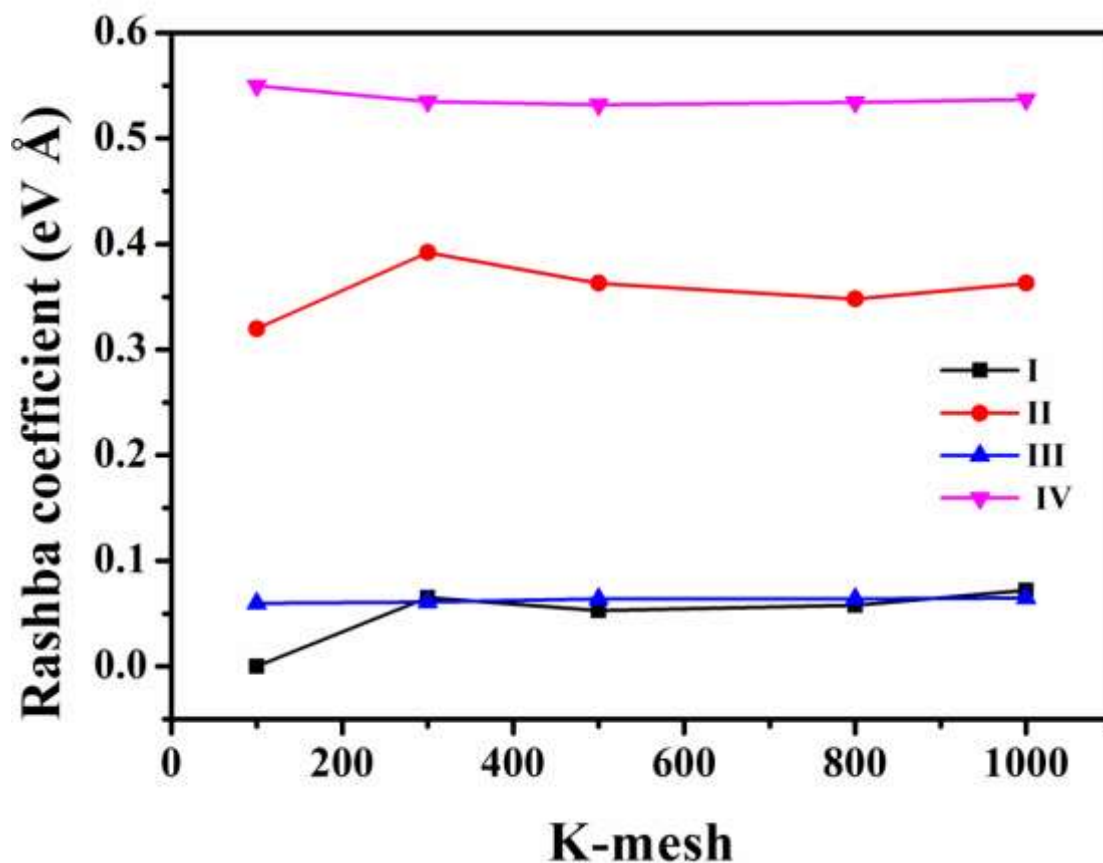

Fig. S1 Rashba coefficients Vs k-mesh. Several distinct constant energy surfaces near the Fermi level are labeled as I-IV (see Fig. 5(a) in the main text) with energies  $E = E_f + 0.40, -0.98, -1.1, \text{ and } -1.3$  eV, respectively.

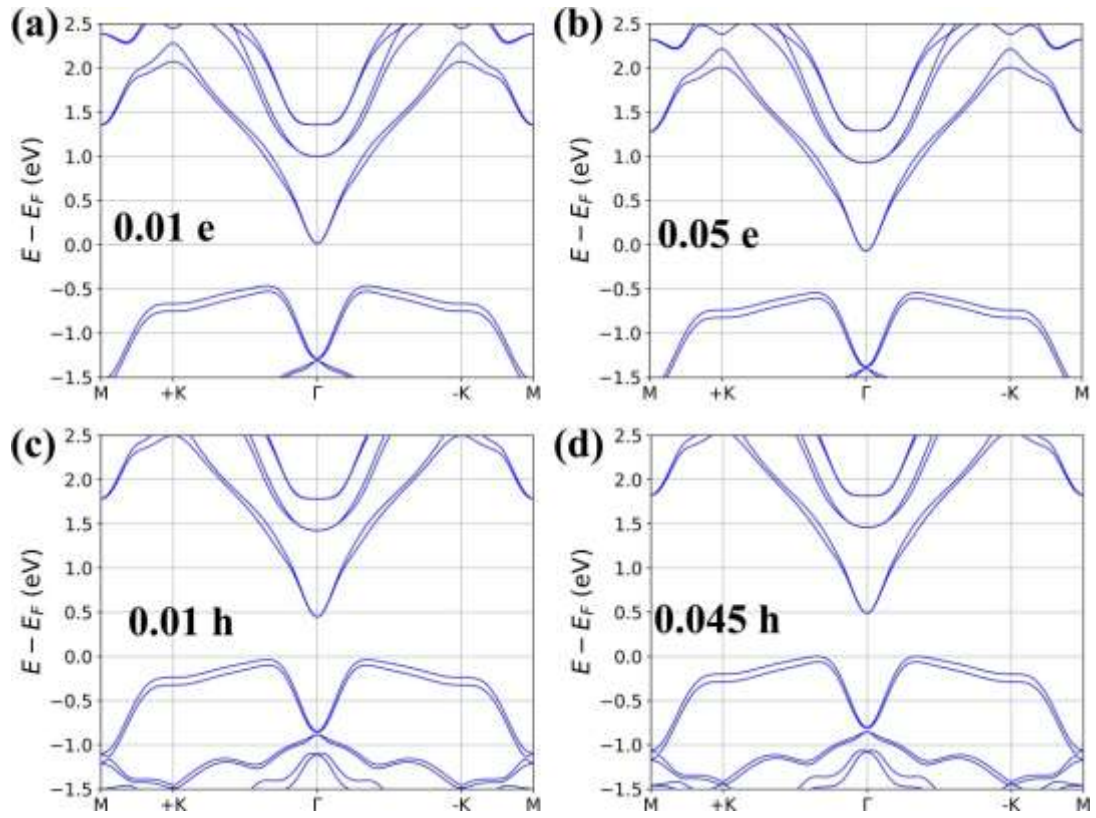

Fig. S2 Charge doping regulates the energy band, especially the Fermi level. Electron doping with (a) 0.01 e and (b) 0.05 e in the upper plane, hole doping with (c) 0.01 h and (d) 0.045 h in the lower plane.

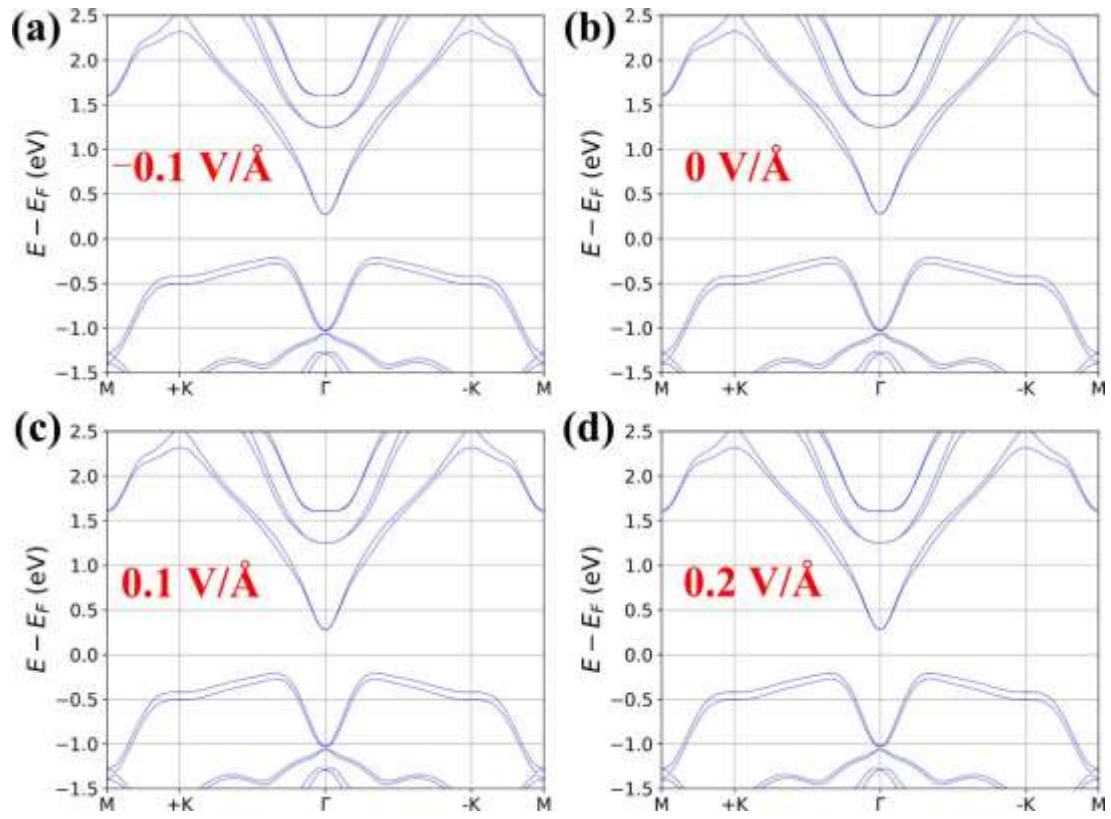

Fig. S3 The electric fields modulate the band structure curves. Representative electric fields are set as follows:  $E = -0.1 \text{ V/\AA}$  (a),  $0 \text{ V/\AA}$  (b),  $0.1 \text{ V/\AA}$  (c), and  $0.2 \text{ V/\AA}$  (d).

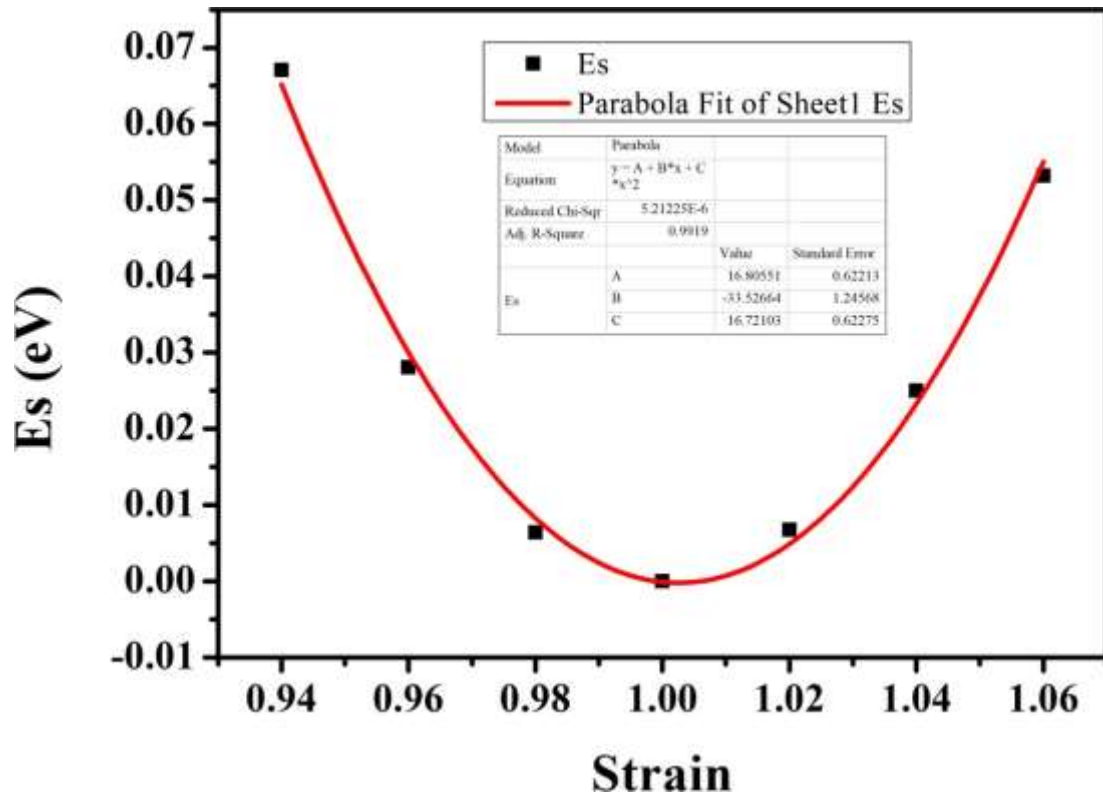

Fig. S4 The system energy (black square shape) varies with the applied strain. The solid red line represents the fitted curve of the relationship between energy and strain.

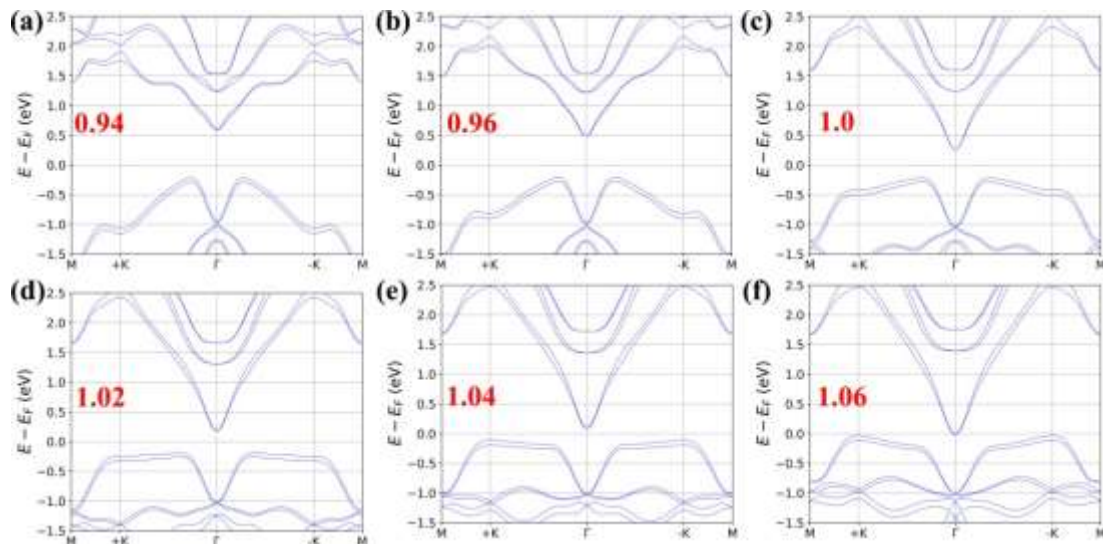

Fig. S5 The strain manipulates the electric band structures and bandgap. Electron band structure diagram with representative strain  $\varepsilon =$  (a) 0.94, (b) 0.96, (c) 1.0, (d)

1.02, (e) 1.04, and (f) 1.06, respectively.
